# Supplementary material for: Neocortical neuronal production and maturation defects in the TcMAC21 mouse model of Down syndrome
Source: PubMed Central journal article supplement — iScience. 2023 Nov 2;26(12):108379. doi: 10.1016/j.isci.2023.108379 (PMC10679816; doi:10.1016/j.isci.2023.108379), 2023-11-02
Supplement: mmc1.pdf [file mmc1.pdf]

iScience, Volume 26

## **Supplemental information**

### **Neocortical neuronal production and maturation defects in the TcMAC21 mouse model of Down syndrome**

**Nobuhiro Kurabayashi, Kazuki Fujii, Yuta Otobe, Shingo Hiroki, Masaharu Hiratsuka, Hikari Yoshitane, Yasuhiro Kazuki, and Keizo Takao**

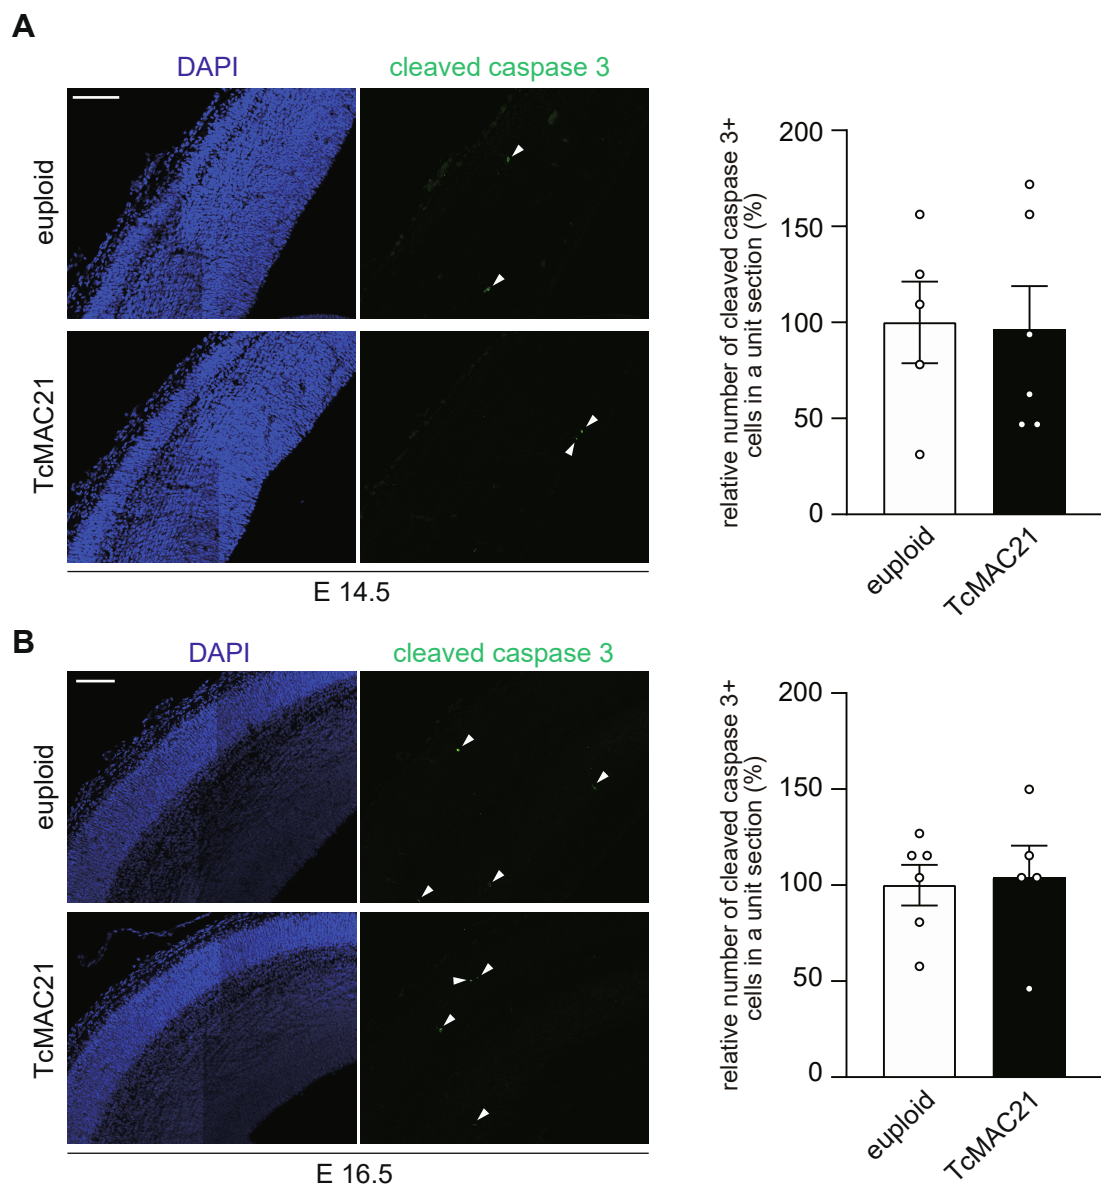

**Figure S1. Apoptotic cell death is not enhanced in the developing TcMAC21 neocortex, related to Figure 1.**

The E14.5 (A) and E16.5 (B) brain sections were immunostained with an antibody against cleaved caspase 3. Nuclei were stained with DAPI. Images of the entire cerebral wall are shown. Arrowheads indicate cleaved caspase 3-positive cells. The graphs on the right show the relative number of cleaved caspase 3-positive cells. Data are presented as means  $\pm$  SEM (for E14.5, n = 5 (euploid) and n = 6 (TcMAC21) from 3 dams, for E16.5, n = 6 (euploid) and n = 5 (TcMAC21) from 3 dams.). Scale bars: 100  $\mu$ m.

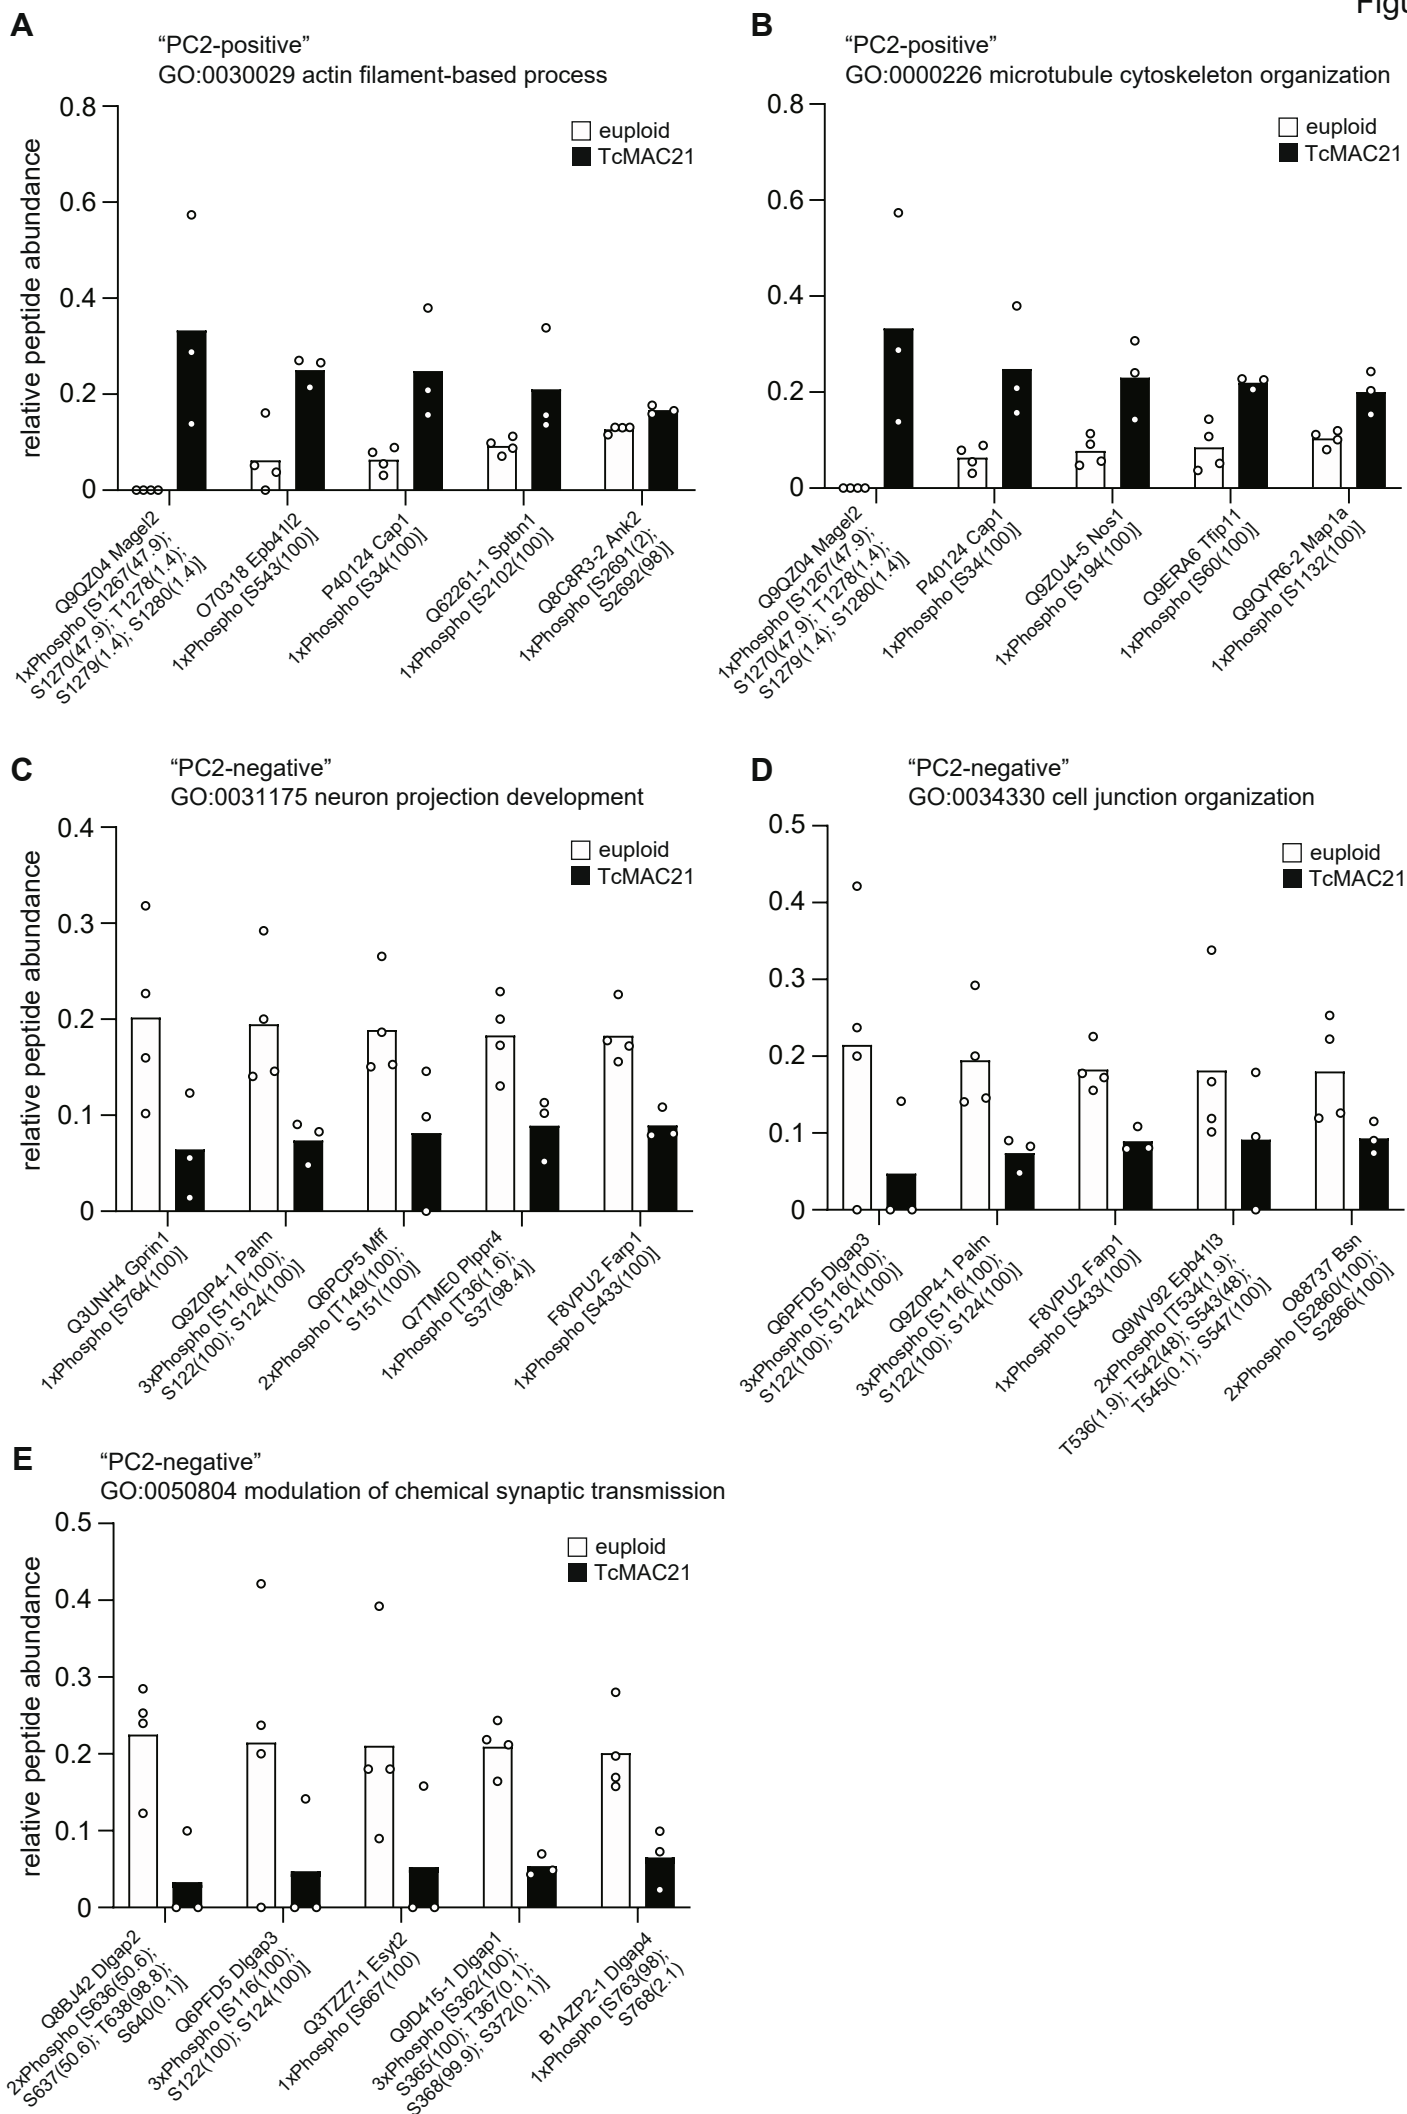



**Figure S2. Alterations in phospho-peptide levels of selected proteins included in enriched GO terms, related to Figure 4.**

(A)-(E) Relative phospho-peptide levels of selected proteins are shown with Uniprot ID and gene symbol. The probability of phosphorylation in each residue is presented in brackets.

Table S7. List of test statistics and p values, related to Figures 1-4 and S1.

| Figure    | Comparison                              | t value | P value  |
|-----------|-----------------------------------------|---------|----------|
| Figure 1C | SOX2+ E14.5<br>euploid vs TcMAC21       | 0.5115  | 0.855912 |
|           | SOX2+ E16.5<br>euploid vs TcMAC21       | 0.7697  | 0.537093 |
|           | TBR2+ E14.5<br>euploid vs TcMAC21       | 5.272   | 0.002771 |
|           | TBR2+ E16.5<br>euploid vs TcMAC21       | 4.278   | 0.015628 |
| Figure 1E | apical PH3+ E14.5<br>euploid vs TcMAC21 | 7.59    | 0.000275 |
|           | apical PH3+ E16.5<br>euploid vs TcMAC21 | 3.015   | 0.036723 |
|           | basal PH3+ E14.5<br>euploid vs TcMAC21  | 4.559   | 0.006257 |
|           | basal PH3+ E16.5<br>euploid vs TcMAC21  | 3.935   | 0.015628 |
| Figure 1G | MGE VZ surface<br>euploid vs TcMAC21    | 4.204   | 0.007699 |
|           | CGE VZ surface<br>euploid vs TcMAC21    | 0.07032 | 0.945217 |
|           | MGE ex-VZ surface<br>euploid vs TcMAC21 | 6.406   | 0.000933 |
|           | CGE ex-VZ surface<br>euploid vs TcMAC21 | 1.666   | 0.411268 |
| Figure 1I | VZ E14.5<br>euploid vs TcMAC21          | 9.665   | 0.000255 |
|           | SVZ E14.5<br>euploid vs TcMAC21         | 0.7653  | 0.844216 |
|           | IZ+CP E14.5<br>euploid vs TcMAC21       | 6.976   | 0.000745 |
|           | VZ E16.5<br>euploid vs TcMAC21          | 6.559   | 0.001364 |
|           | SVZ E16.5<br>euploid vs TcMAC21         | 1.056   | 0.537093 |
|           | IZ E16.5<br>euploid vs TcMAC21          | 4.612   | 0.015628 |
|           |                                         |         |          |
| Figure 1J | E14.5<br>euploid vs TcMAC21             | 7.436   | 0.00031  |
|           | E16.5                                   | 9.499   | 0.001364 |

|           |                                                   |         |          |
|-----------|---------------------------------------------------|---------|----------|
|           | euploid vs TcMAC21                                |         |          |
| Figure 2E | E14.5 TBR1+<br>euploid vs TcMAC21                 | 5.703   | 0.004279 |
|           | E16.5 TBR1+<br>euploid vs TcMAC21                 | 8.658   | 0.000057 |
|           | P0.5 TBR1+<br>euploid vs TcMAC21                  | 6.174   | 0.001091 |
|           | E16.5 CTIP2+<br>euploid vs TcMAC21                | 6.223   | 0.000822 |
|           | P0.5 CTIP2+<br>euploid vs TcMAC21                 | 3.64    | 0.008509 |
|           | P0.5 SATB2+<br>euploid vs TcMAC21                 | 8.82    | 0.000264 |
| Figure 3D | SATB2+<br>euploid vs TcMAC21                      | 5.953   | 0.003266 |
|           | CTIP2+<br>euploid vs TcMAC21                      | 7.633   | 0.000214 |
|           | TBR1+<br>euploid vs TcMAC21                       | 7.377   | 0.000378 |
|           | PV+<br>euploid vs TcMAC21                         | 5.152   | 0.009779 |
|           | SOM+<br>euploid vs TcMAC21                        | 5.486   | 0.009779 |
|           | VIP+<br>euploid vs TcMAC21                        | 0.06488 | 0.949742 |
|           | CR+<br>euploid vs TcMAC21                         | 0.7886  | 0.836952 |
|           | ALDH1L1+<br>euploid vs TcMAC21                    | 1.398   | 0.665953 |
|           | OLIG2+<br>euploid vs TcMAC21                      | 0.958   | 0.836952 |
|           | GST $\pi$ +<br>euploid vs TcMAC21                 | 2.488   | 0.305533 |
|           | GST $\pi$ /OLIG2+<br>euploid vs TcMAC21           | 4.504   | 0.012372 |
|           | IBA1+<br>euploid vs TcMAC21                       | 0.9501  | 0.836952 |
| Figure S1 | E14.5 cleaved caspase<br>3+<br>euploid vs TcMAC21 | 0.1173  | 0.9092   |
|           | E16.5 cleaved caspase<br>3+<br>euploid vs TcMAC21 | 0.1943  | 0.8515   |
